# Supplementary material for: Unprecedented amidation of ‘transient’ aryl thioaldehydes by N,N-dimethylformamide under basic conditions
Source: Royal Society of Chemistry journal article supplement (doi:10.1039/c4nj00480a), 2014-05-16

Journal Name: New Journal of Chemistry

## Electronic Supplementary Information

### Unprecedented amidation of 'transient' aryl thioaldehydes by *N,N*-dimethylformamide under basic conditions

Basudeb Basu\* and Samir Kundu

Department of Chemistry, North Bengal University, Darjeeling 734013, India

Corresponding author: basu\_nbu@hotmail.com (B. Basu)

Fax: +91 353 2699001

### Table of Contents

- S1. NMR Spectral data for compounds in Table 2; entry 1-9 (**4a** – **4i**).
- S2. X-ray analysis data and ortep diagrams for compounds **4a** & **4d**.
- S3. Scanned copies of <sup>1</sup>H & <sup>13</sup>C spectra for compounds Table 2; entry 1-9 (**4a** – **4i**).

**S1. NMR spectral data for compounds in Table 2 (4a–4i)****Table 2; entry 1**

*N,N*-Dimethylbenzothioamide (**4a**), Yellow solid, mp 69-71 °C.<sup>1</sup> IR (KBr,  $\nu$  cm<sup>-1</sup>): 1525.6, 1386.7, 1272.9, 1134.1, 989.4, 759.9. <sup>1</sup>H NMR (300 MHz, CDCl<sub>3</sub>),  $\delta$ : 3.12 (s, 3H, NCH<sub>3</sub>), 3.56 (s, 3H, NCH<sub>3</sub>), 7.28-7.31 (m, 5H, ArH). <sup>13</sup>C NMR (75 MHz, CDCl<sub>3</sub>),  $\delta$ : 42.8, 43.8, 125.3, 127.9, 128.1, 143.0, 200.6.

**Table 2; entry 2**

**4-Methoxy-*N,N*-dimethylbenzothioamide (4b)**, Pale yellow liquid. IR (Nujol,  $\nu$  cm<sup>-1</sup>): 1525.3, 1394.4, 1277.6, 1141.8, 1086.8, 989.4, 823.3. <sup>1</sup>H NMR (300 MHz, CDCl<sub>3</sub>),  $\delta$ : 3.22 (s, 3H, NCH<sub>3</sub>), 3.58 (s, 3H, NCH<sub>3</sub>), 3.92 (s, 3H, OCH<sub>3</sub>), 6.86-6.88 (m, 2H, ArH), 7.27-7.32 (m, 2H, ArH). <sup>13</sup>C NMR (75 MHz, CDCl<sub>3</sub>),  $\delta$ : 43.5, 44.2, 56.4, 111.2, 126.8, 131.1, 156.2, 199.4.

**Table 2; entry 3**

*N,N*-Dimethyl-4-nitrobenzothioamide (**4c**), Yellow solid, mp 142-144 °C.<sup>2</sup> IR (KBr,  $\nu$  cm<sup>-1</sup>): 1525.6, 1382.7, 1273.9, 1134.5, 989.4, 752.9. <sup>1</sup>H NMR (300 MHz, CDCl<sub>3</sub>),  $\delta$ : 3.18 (s, 3H, NCH<sub>3</sub>), 3.61 (s, 3H, NCH<sub>3</sub>), 7.46 (d,  $J$  = 8.7 Hz, 2H, ArH), 8.22 (d,  $J$  = 9.0 Hz, 2H, ArH). <sup>13</sup>C NMR (75 MHz, CDCl<sub>3</sub>),  $\delta$ : 42.9, 43.9, 123.8, 126.5, 147.2, 148.8, 197.8.

**Table 2; entry 4**

**4-Chloro-*N,N*-dimethylbenzothioamide (4d)**, Yellow solid, mp 80-82 °C.<sup>3</sup> IR (KBr,  $\nu$  cm<sup>-1</sup>): 1525.6, 1394.4, 1280.6, 1141.8, 1087.8, 989.4, 829.3. <sup>1</sup>H NMR (300 MHz, CDCl<sub>3</sub>),  $\delta$ : 3.15 (s, 3H, NCH<sub>3</sub>), 3.57 (s, 3H, NCH<sub>3</sub>), 7.22-7.32 (m, 4H, ArH). <sup>13</sup>C NMR (75 MHz, CDCl<sub>3</sub>),  $\delta$ : 43.3, 44.1, 127.3, 128.6, 134.6, 141.7, 200.0.

**Table 2; entry 5**

**3-Chloro-*N,N*-dimethylbenzothioamide (4e)**, Pale yellow liquid. IR (Nujol,  $\nu$  cm<sup>-1</sup>): 1525.6, 1394.4, 1280.6, 1141.8, 1087.8, 989.4, 829.3. <sup>1</sup>H NMR (300 MHz, CDCl<sub>3</sub>),  $\delta$ : 3.17 (s, 3H, NCH<sub>3</sub>), 3.59 (s, 3H, NCH<sub>3</sub>), 7.15-7.19 (m, 1H, ArH), 7.27-7.30 (m, 3H, ArH). <sup>13</sup>C NMR (75 MHz, CDCl<sub>3</sub>),  $\delta$ : 43.1, 44.1, 123.7, 125.8, 128.5, 129.7, 134.2, 144.7, 199.1.

**Table 2; entry 6**

**2-Chloro-*N,N*-dimethylbenzothioamide (4f)**, Pale yellow liquid. IR (Nujol,  $\nu$  cm<sup>-1</sup>): 1525.6, 1394.4, 1280.6, 1141.8, 1087.8, 989.4, 829.3. <sup>1</sup>H NMR (300 MHz, CDCl<sub>3</sub>),  $\delta$ : 3.11 (s, 3H,

NCH<sub>3</sub>), 3.61 (s, 3H, NCH<sub>3</sub>), 7.26-7.35 (m, 4H, ArH). <sup>13</sup>C NMR (75 MHz, CDCl<sub>3</sub>), δ: 42.3, 42.8, 127.3, 127.7, 128.1, 129.3, 129.6, 142.0, 196.8.

**Table 2; entry 7**

**4-Bromo-*N,N*-dimethylbenzothioamide (4g)**, Yellow solid, mp 120-122 °C.<sup>3</sup> IR (KBr, ν cm<sup>-1</sup>): 1525.6, 1394.4, 1280.6, 1141.8, 1087.8, 989.4, 829.3. <sup>1</sup>H NMR (300 MHz, CDCl<sub>3</sub>), δ: 3.18 (s, 3H, NCH<sub>3</sub>), 3.59 (s, 3H, NCH<sub>3</sub>), 7.17-7.21 (m, 2H, ArH), 7.47-7.53 (m, 2H, ArH). <sup>13</sup>C NMR (75 MHz, CDCl<sub>3</sub>), δ: 43.2, 44.1, 122.7, 127.4, 131.5, 142.0, 199.8.

**Table 2; entry 8**

**3-Iodo-*N,N*-dimethylbenzothioamide (4h)**, Pale yellow liquid. IR (Nujol, ν cm<sup>-1</sup>): 1521.7, 1394.4, 1294.1, 1137.9, 997.1, 759.9, 698.2. <sup>1</sup>H NMR (300 MHz, CDCl<sub>3</sub>), δ: 3.15 (s, 3H, NCH<sub>3</sub>), 3.56 (s, 3H, NCH<sub>3</sub>), 7.06-7.11 (m, 1H, ArH), 7.23-7.27 (m, 2H, ArH), 7.64-7.66 (m, 1H, ArH). <sup>13</sup>C NMR (75 MHz, CDCl<sub>3</sub>), δ: 43.1, 44.1, 94.0, 124.8, 130.0, 134.3, 137.5, 145.0, 198.9.

**Table 2; entry 9**

***N,N*-Dimethylnaphthalene-1-carbothioamide (4i)**, Pale yellow liquid. IR (Nujol, ν cm<sup>-1</sup>): 1525.6, 1384.2, 1274.0, 1144.1, 983.2, 759.7. <sup>1</sup>H NMR (300 MHz, CDCl<sub>3</sub>), δ: 2.94 (s, 3H, NCH<sub>3</sub>), 3.69 (s, 3H, NCH<sub>3</sub>), 7.34-7.37 (m, 1H, ArH), 7.42-7.51 (m, 3H, ArH), 7.69-7.72 (m, 1H, ArH), 7.77-7.84 (m, 2H, ArH). <sup>13</sup>C NMR (75 MHz, CDCl<sub>3</sub>), δ: 42.4, 43.3, 122.8, 124.3, 125.2, 126.1, 126.9, 127.7, 128.1, 128.2, 133.3, 140.8, 199.5.

**References:**

1. C. Johnr, *J. Org. Chem.*, 1982, **47**, 4645.
2. B. Denis, *Synth. Commun.*, 1990, **20**, 3085.
3. A. O. Joseph, *Synthesis*, 1983, **9**, 730.

## S2. X-ray analysis data and ortep diagram for compounds 4a & 4d

The crystal data of compound **4a** and **4d** has already been deposited at Cambridge Crystallographic Data Centre. The CCDC reference numbers are 994136 and 994137 respectively. Software used for data collection is Mercury 3.3.

### X-ray analysis data for compounds 4a (smk-164) and 4d (smk-170)

| Identification code                 | 4a (smk-164)                                                                                         | 4d (smk-170)                                                                                         |
|-------------------------------------|------------------------------------------------------------------------------------------------------|------------------------------------------------------------------------------------------------------|
| Empirical formula                   | C <sub>9</sub> H <sub>11</sub> NS                                                                    | C <sub>9</sub> H <sub>10</sub> CINS                                                                  |
| Formula weight                      | 165.25                                                                                               | 199.69                                                                                               |
| Temperature                         | 296 K                                                                                                | 296 K                                                                                                |
| Wave length                         | 0.71073                                                                                              | 0.71073                                                                                              |
| Bond precision(C-C)                 | 0.0027 Å                                                                                             | 0.0030 Å                                                                                             |
| Space group                         | P2 (1) /n                                                                                            | P2 (1)/c                                                                                             |
| Hall group                          | -P 2yn                                                                                               | -P 2ybc                                                                                              |
| Unit cell dimensions                | a = 5.9271 (15) Å<br>b = 12.790 (3) Å<br>c = 12.361 (3) Å<br>α = 90°<br>β = 100.163 (13)°<br>γ = 90° | a = 10.1194 (3) Å<br>b = 14.4115 (4) Å<br>c = 7.3247 (2) Å<br>α = 90°<br>β = 106.198 (2)°<br>γ = 90° |
| Volume (calculated)                 | 922.4 (4) Å <sup>3</sup>                                                                             | 1026.18 (5) Å <sup>3</sup>                                                                           |
| Density (calculated)                | 1.190 g/cm <sup>3</sup>                                                                              | 1.293 g/cm <sup>3</sup>                                                                              |
| Z                                   | 4                                                                                                    | 4                                                                                                    |
| Absorption coefficient (Mu)         | 0.287 mm <sup>-1</sup>                                                                               | 0.522 mm <sup>-1</sup>                                                                               |
| F(000)                              | 352.0                                                                                                | 416.0                                                                                                |
| Index ranges (h, k, l max)          | 7, 15, 14                                                                                            | 12, 17, 8                                                                                            |
| Nref (calculated)                   | 1610                                                                                                 | 1808                                                                                                 |
| Data completeness                   | 98.9%                                                                                                | 99.9%                                                                                                |
| Theta (max)                         | 24.99°                                                                                               | 25.00°                                                                                               |
| R(reflections)/wR2<br>(reflections) | 0.0342 (1290)/0.0958 (1593)                                                                          | 0.0439 (1355)/0.1340 (1807)                                                                          |
| S                                   | 1.005                                                                                                | 1.049                                                                                                |

**Ortep diagrams for compounds 4a and 4d**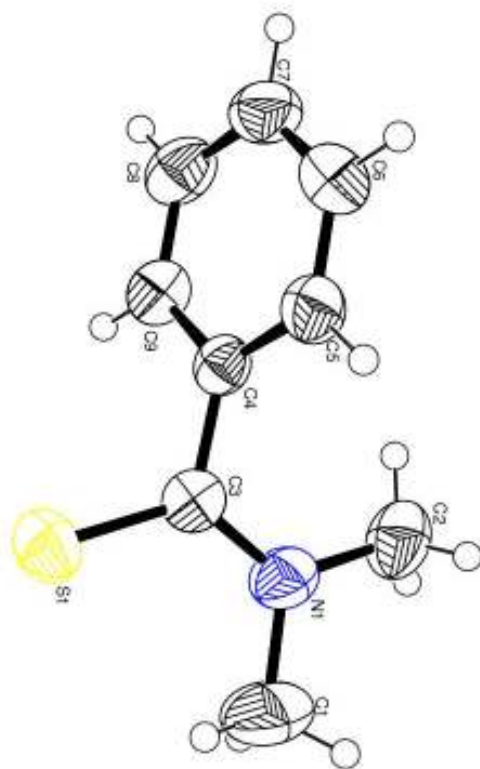*N,N*-Dimethylbenzothioamide (4a)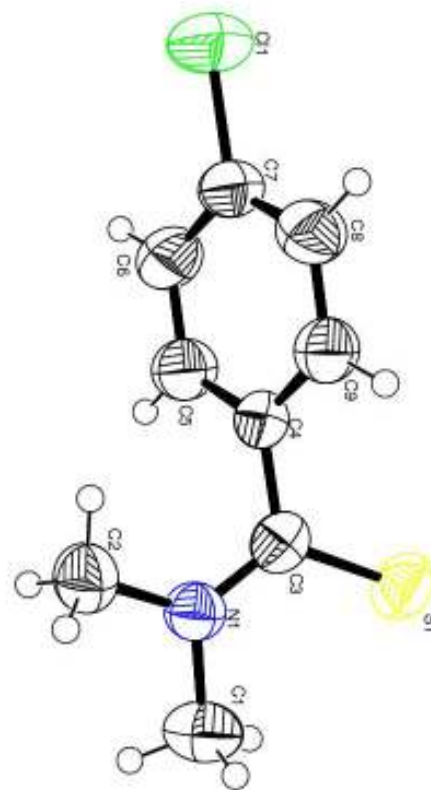4-Chloro-*N,N*-dimethylbenzothioamide (4d)

S3. Scanned copies of  $^1\text{H}$  &  $^{13}\text{C}$  spectra for compounds Table 2; entries 1-9 (4a – 4i).

## Table 2; entry 1

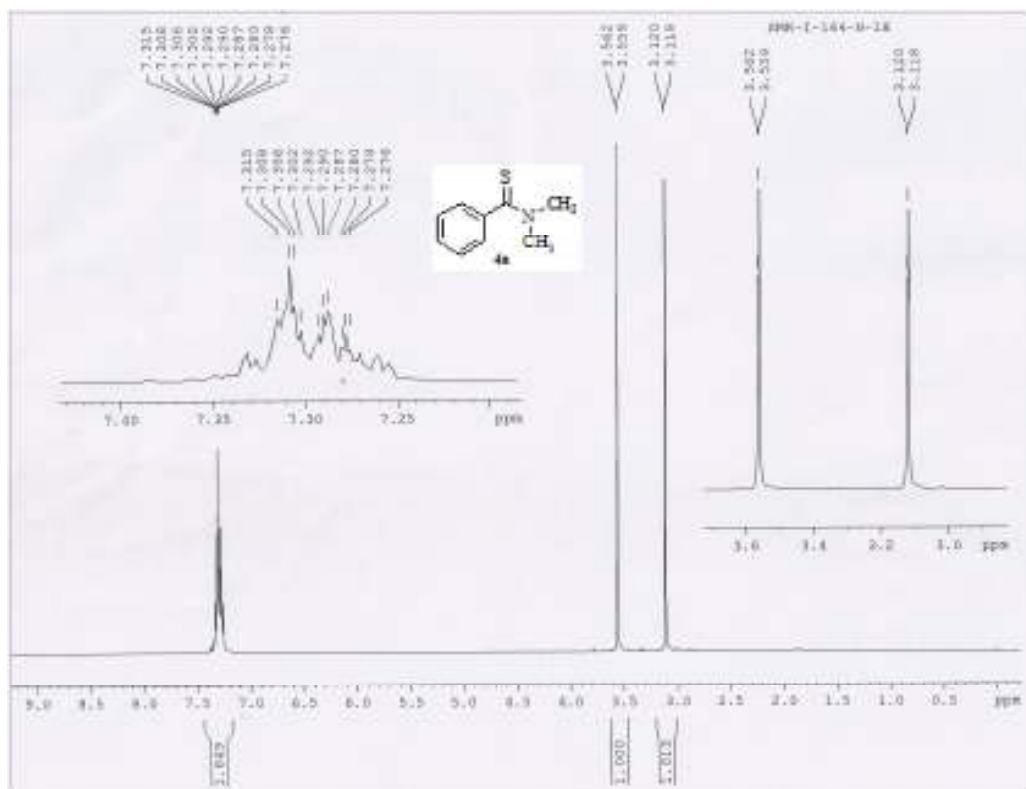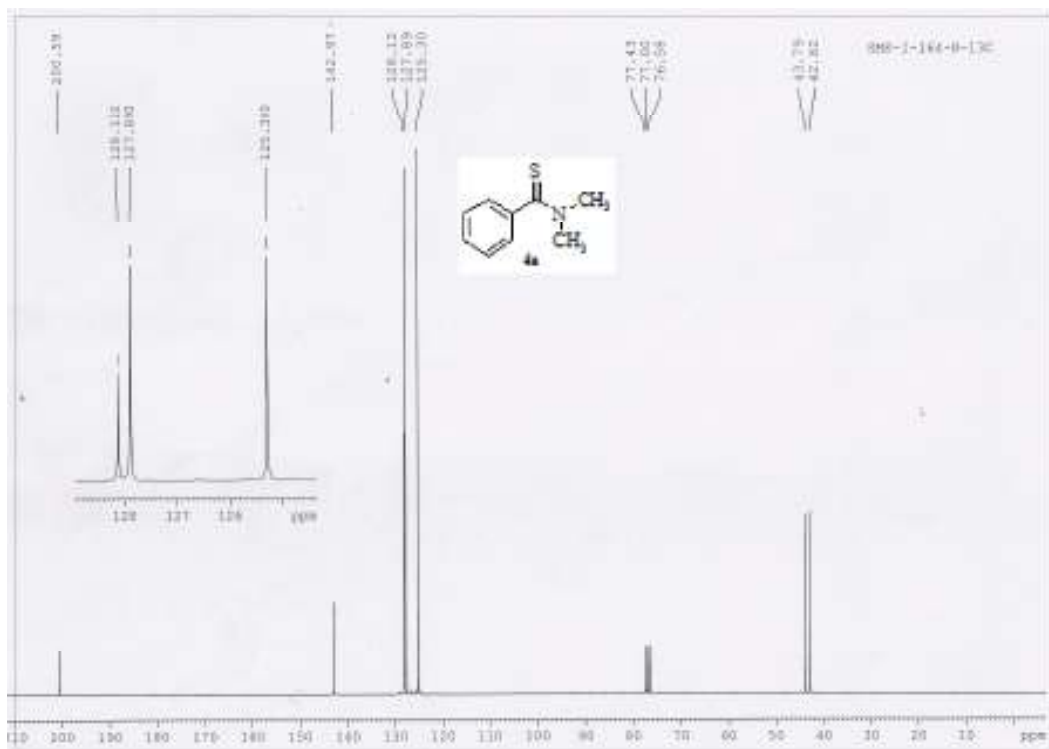

Table 2; entry 2

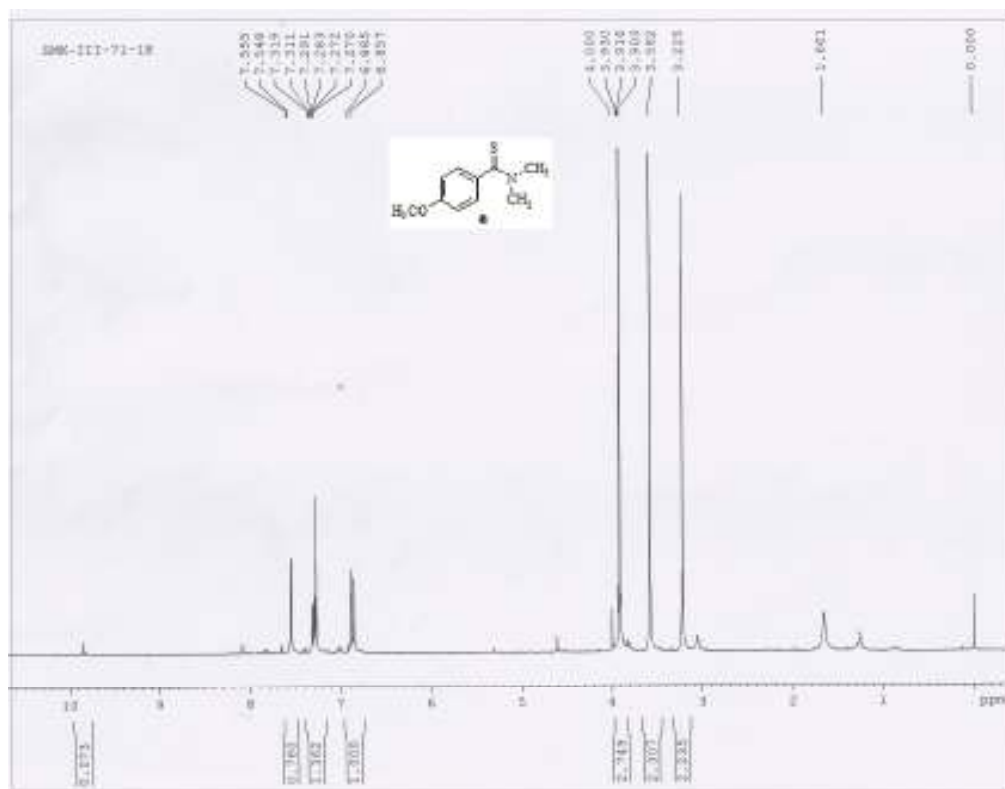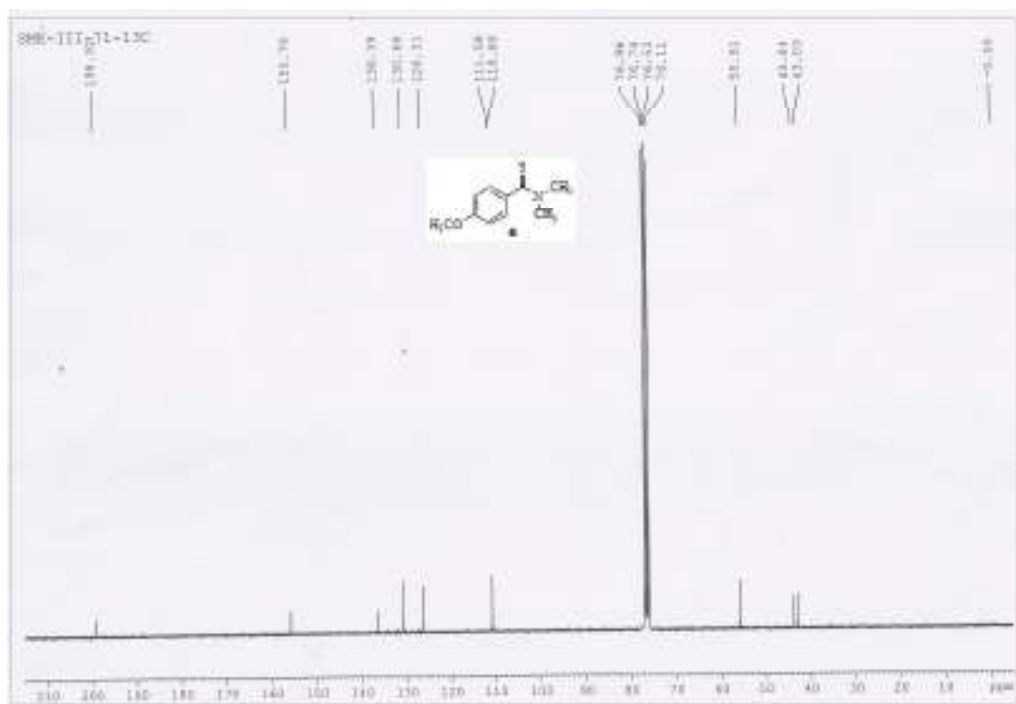

Table 2; entry 3

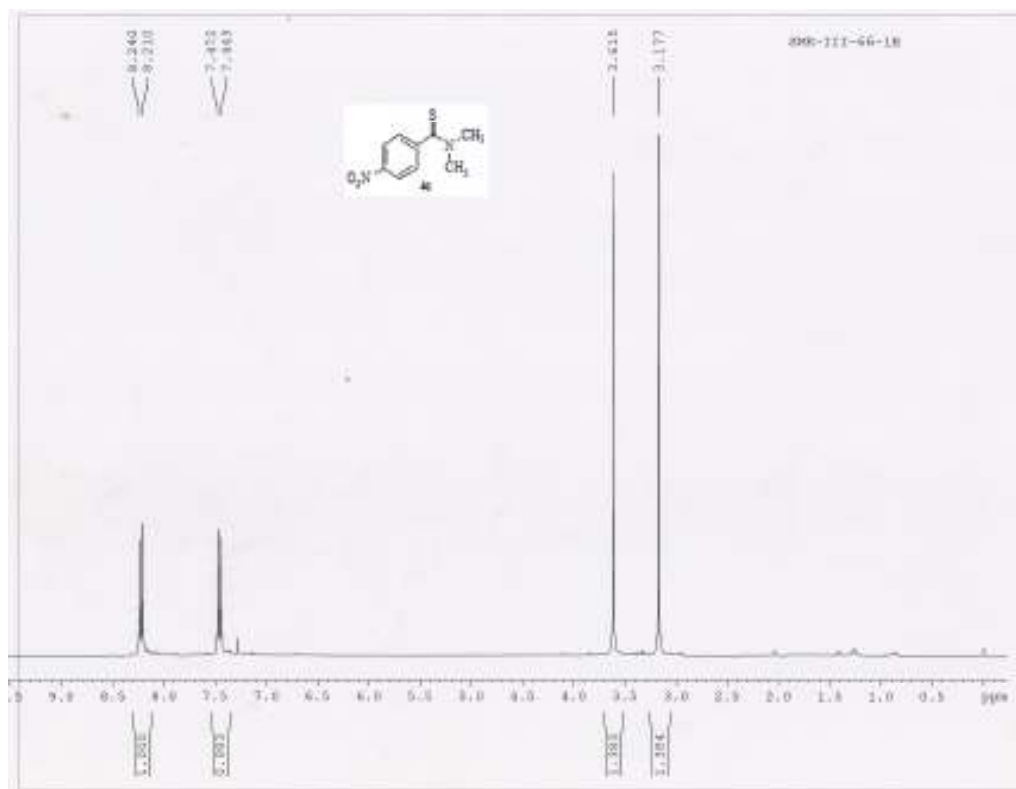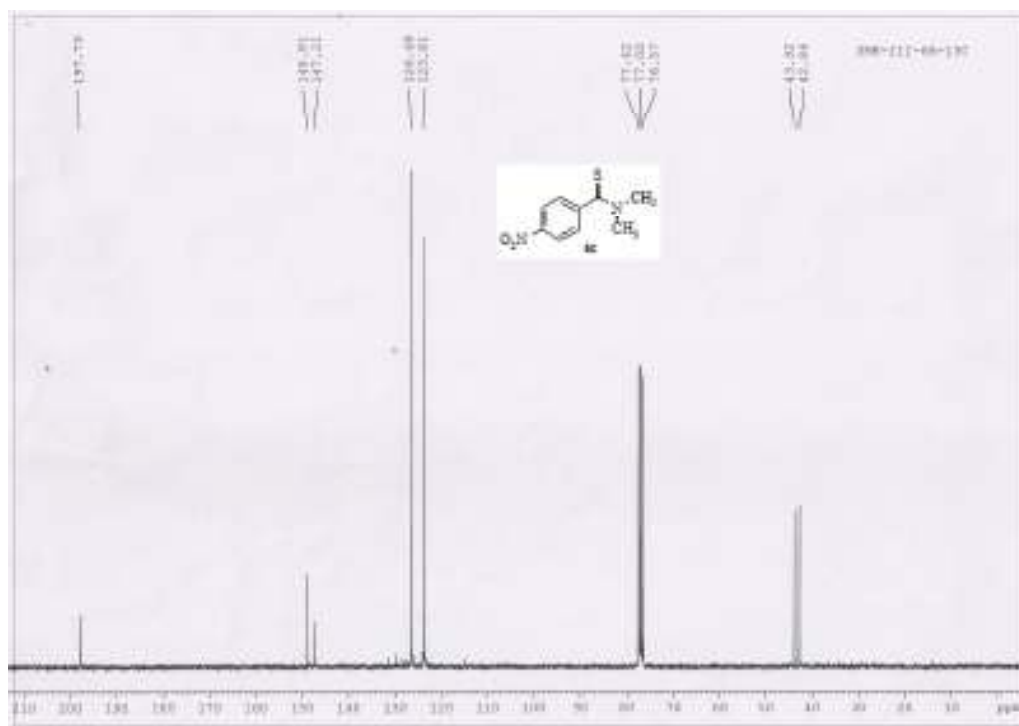



Table 2; entry 4

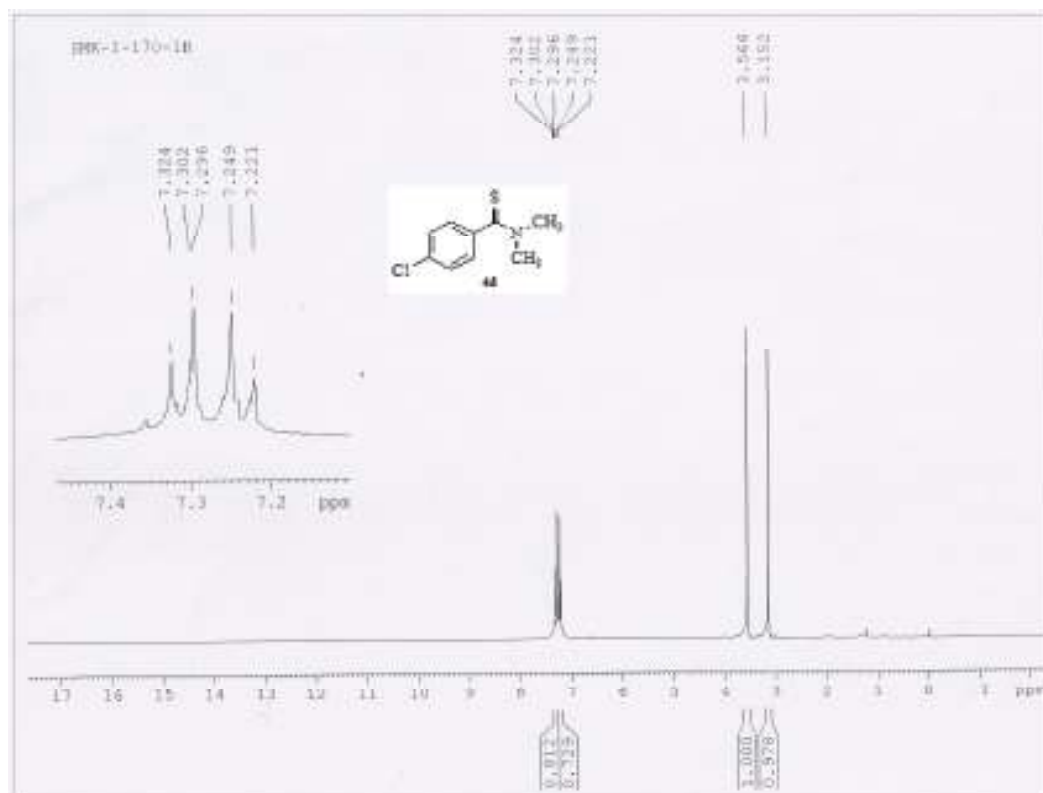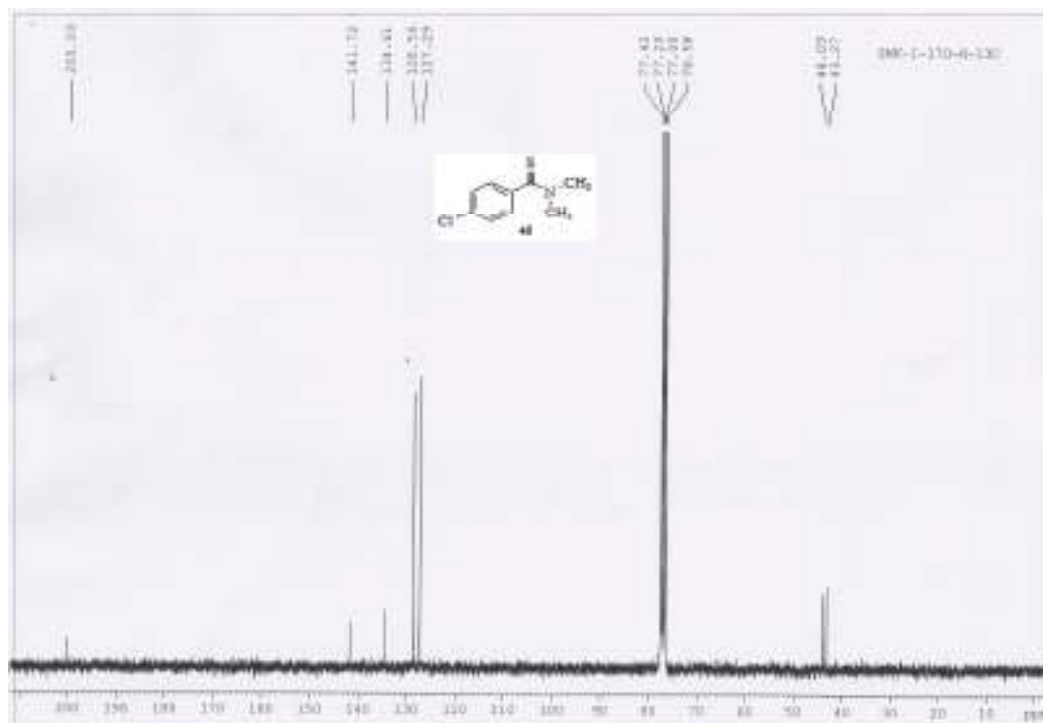

Table 2; entry 5

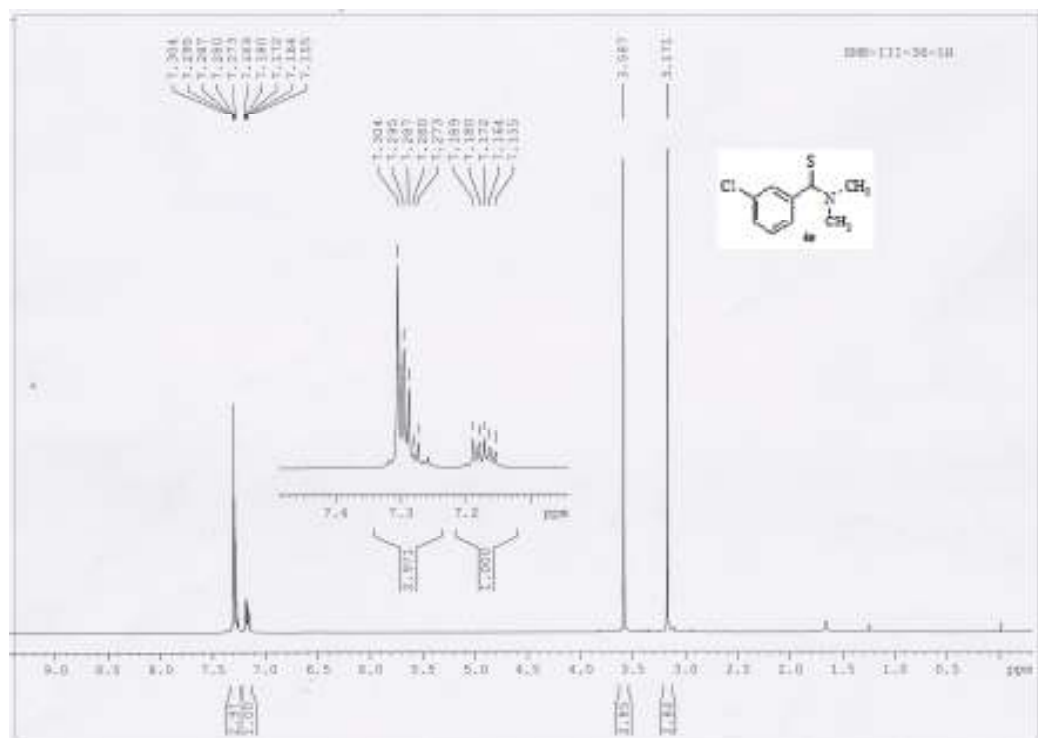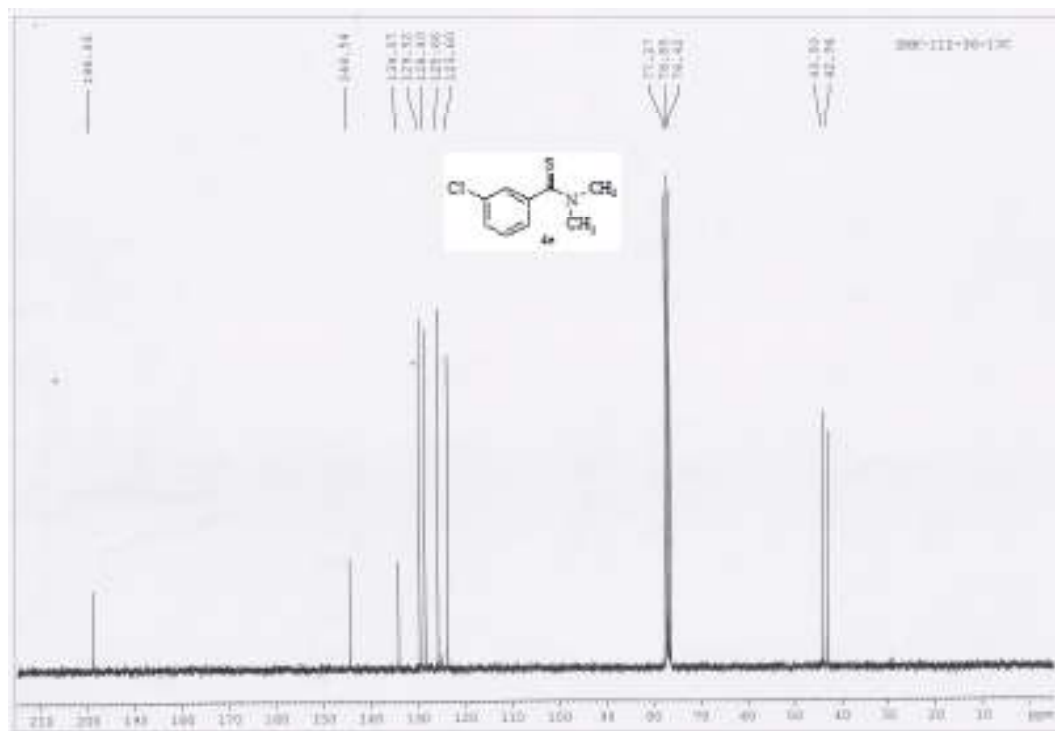

Table 2; entry 6

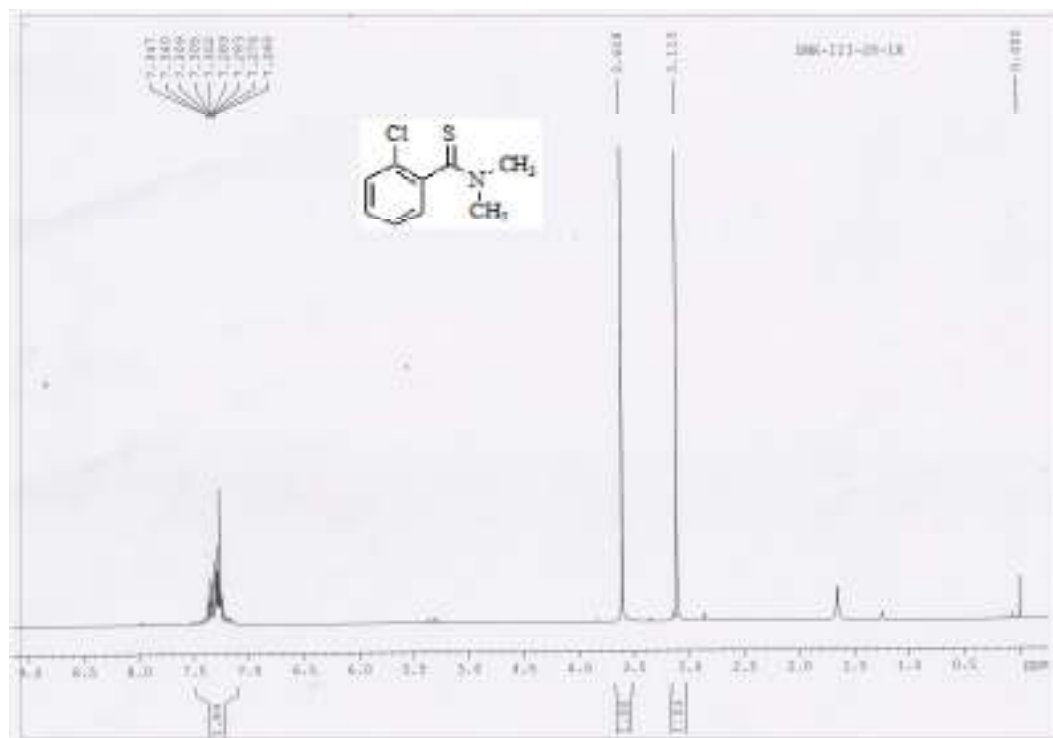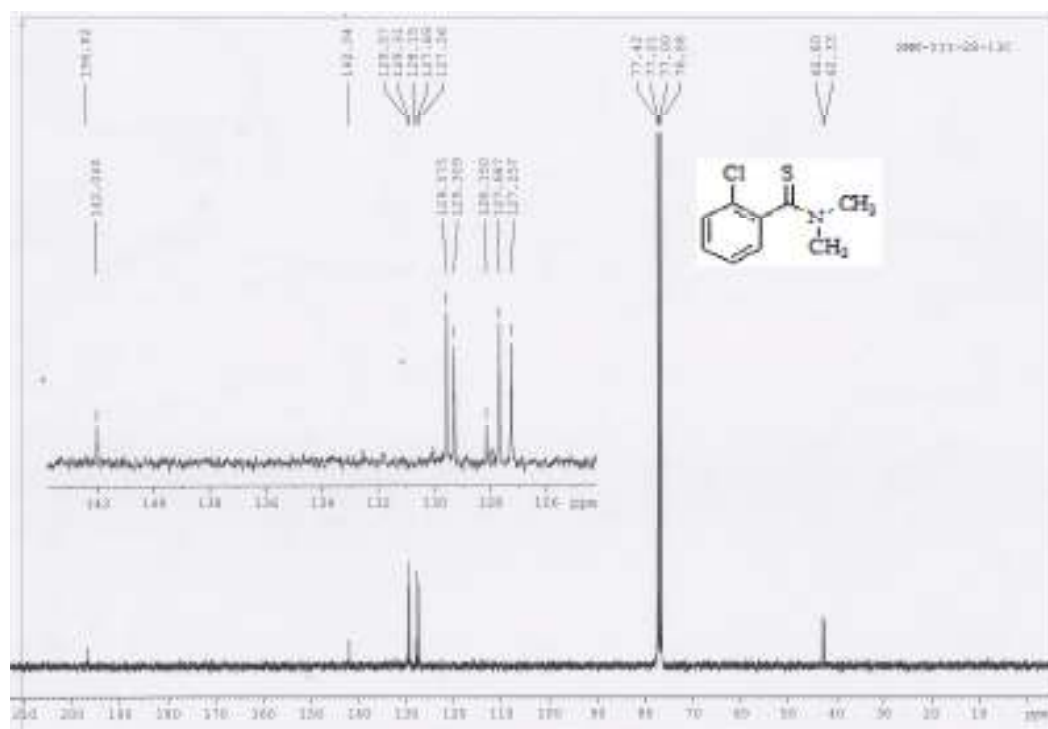

Table 2; entry 7

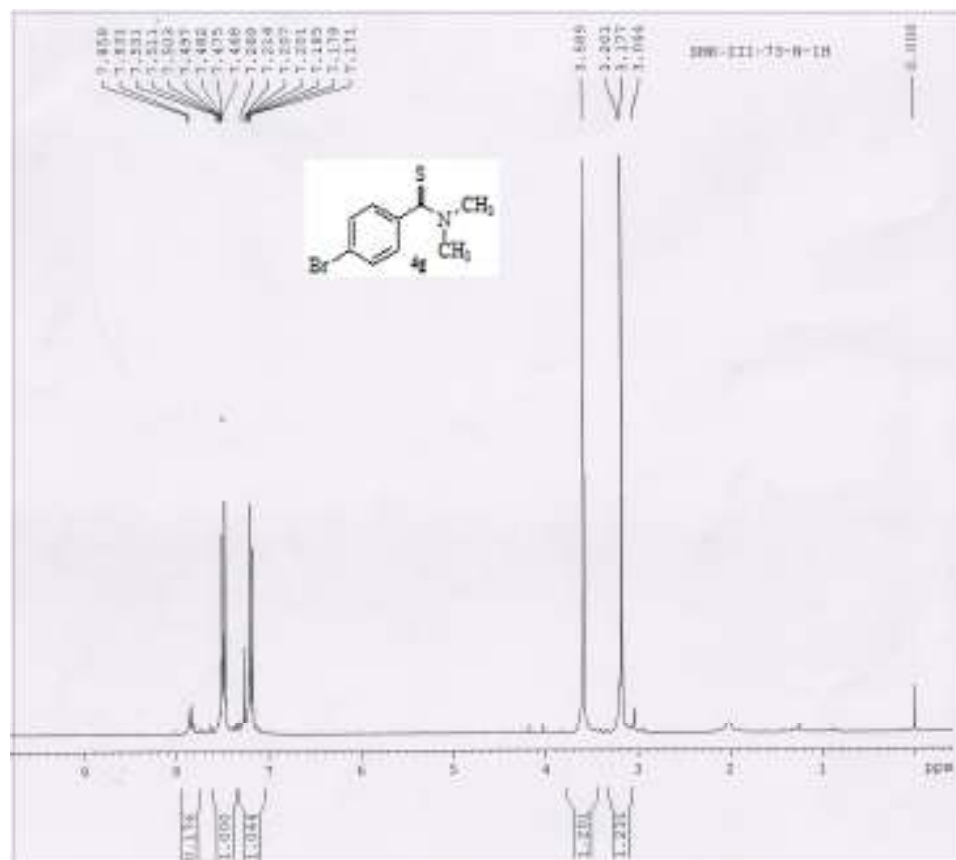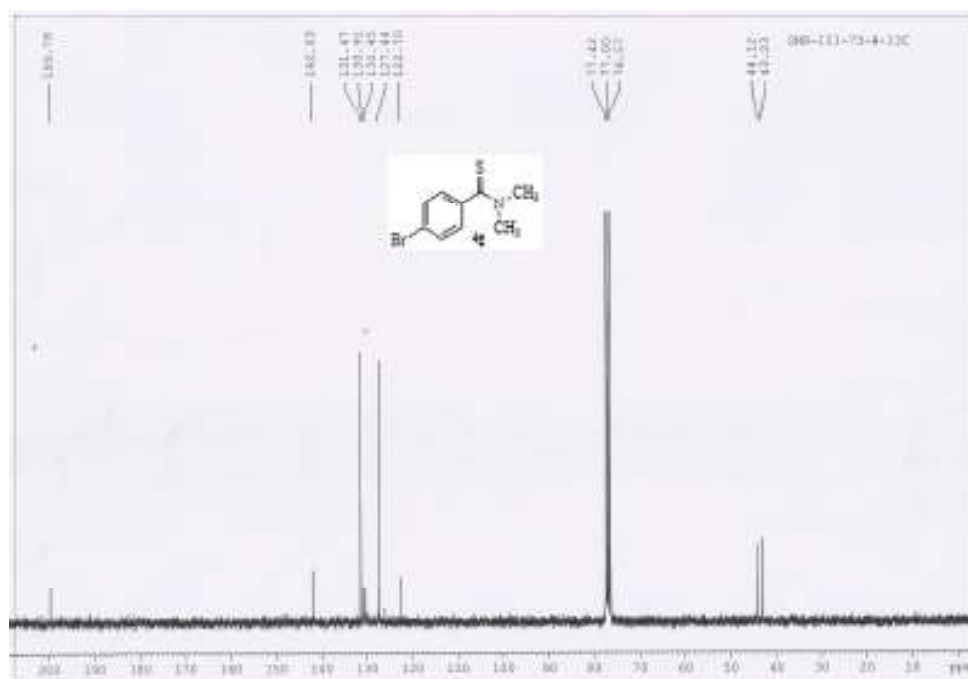

Table 2; entry 8

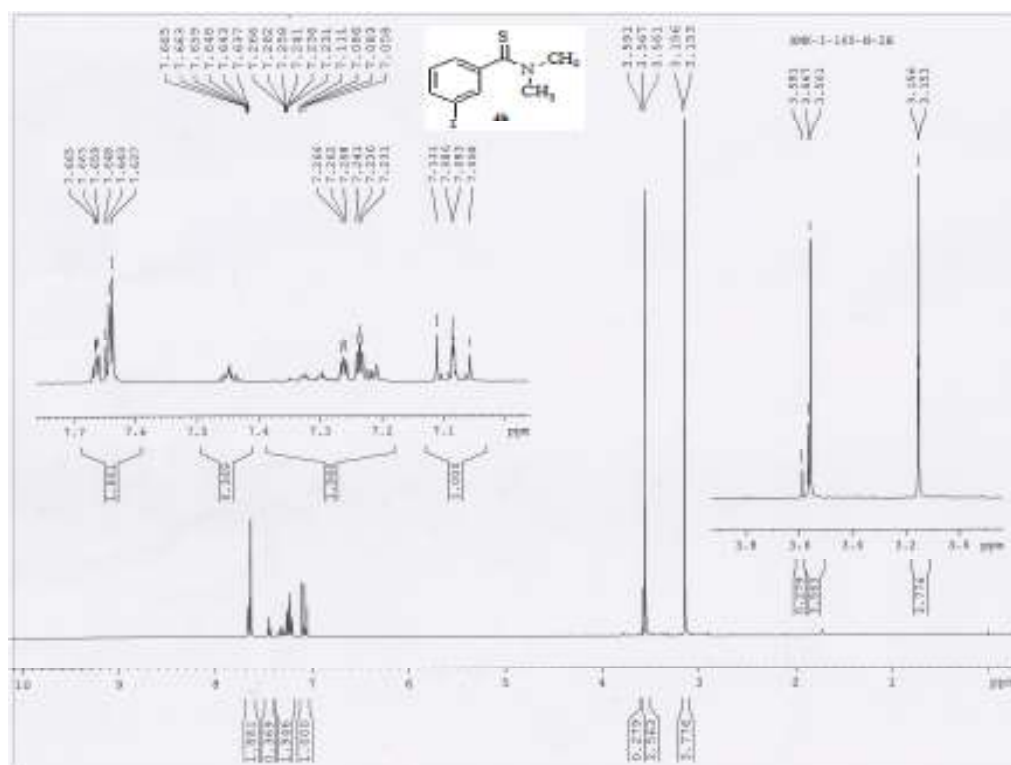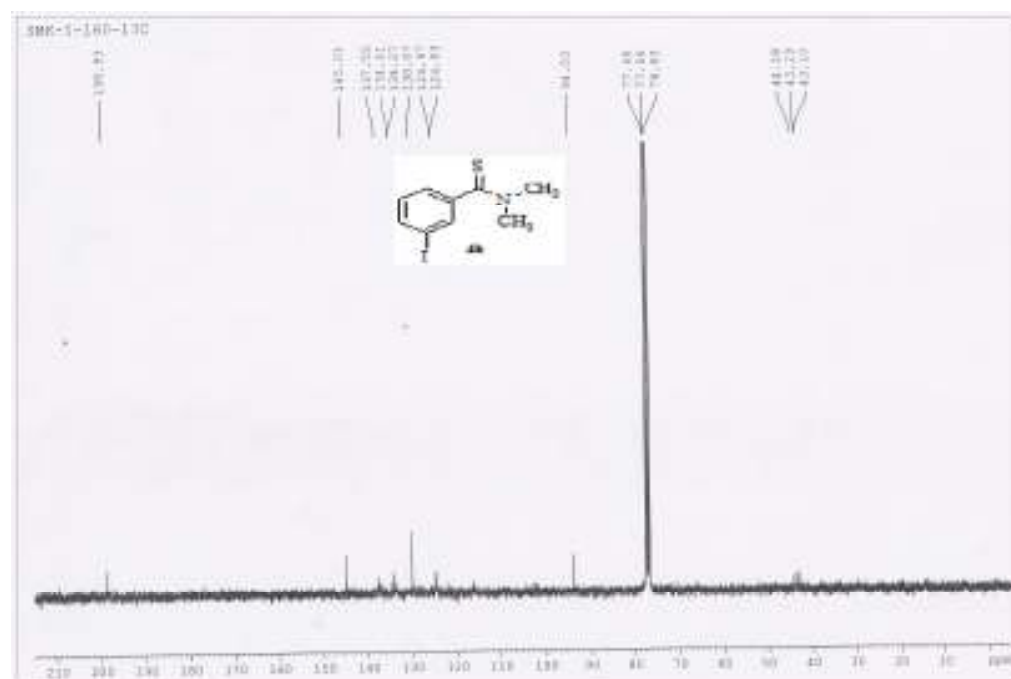

Supplement: c4nj00480a1.pdf [file c4nj00480a1.pdf]
